# Supplementary material
Source: bioRxiv or medRxiv preprint supplement (https://medrxiv.org/highwire/filestream/86283/field_highwire_adjunct_files/1/2020.06.17.20133520-2.pdf)

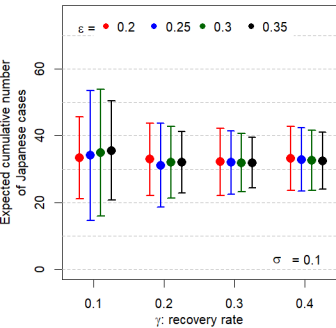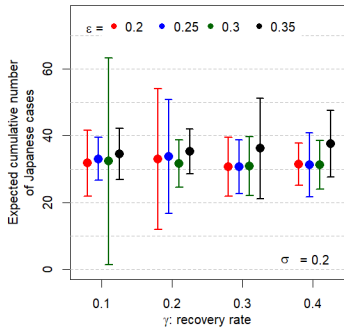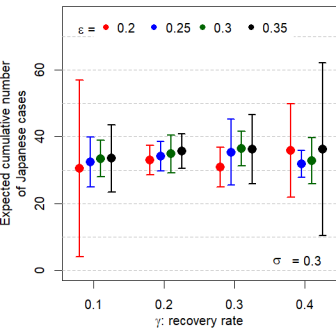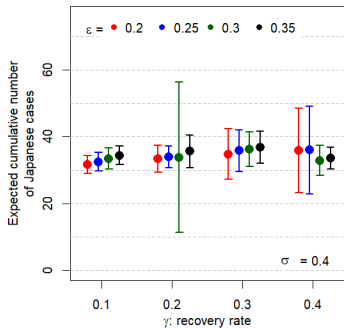

Supplement: Supplementary file [file 2020.06.17.20133520-2.pdf]
